# Supplementary material for: Molecular detection of viruses in Kenyan bats and discovery of novel astroviruses, caliciviruses and rotaviruses
Source: PubMed Central journal article supplement (PMC6702250; doi:10.1007/s12250-016-3930-2), 2017-04-06
Supplement: 12250_2016_3930_MOESM1_ESM.pdf [file 12250_2016_3930_MOESM1_ESM.pdf]

## Electronic Supplementary Material

# Molecular detection of viruses in Kenyan bats and discovery of novel astroviruses, caliciviruses and rotaviruses

Cecilia Waruhiu<sup>1,2</sup>, Sheila Ommeh<sup>3✉</sup>, Vincent Obanda<sup>4</sup>, Bernard Agwanda<sup>5</sup>, Francis Gakuya<sup>4</sup>, Xing-Yi Ge<sup>1,2</sup>, Xing-Lou Yang<sup>1,2</sup>, Li-Jun Wu<sup>1</sup>, Ali Zohaib<sup>1</sup>, Ben Hu<sup>1,2</sup>, Zheng-Li Shi<sup>1,2✉</sup>

1. Key Lab of Special Pathogens, Wuhan Institute of Virology, Chinese Academy of Sciences, Wuhan 430071, China.
2. Sino-Africa Joint Research Center, Chinese Academy of Sciences, Wuhan 430071, China.
3. Institute of Biotechnology Research, Jomo Kenyatta University of Science and Technology, Nairobi 00200, Kenya.
4. Veterinary Services Department, Kenya Wildlife Service, Nairobi 00100, Kenya.
5. Mammalogy Section, National Museum of Kenya, Nairobi 00100, Kenya.

Supporting information to DOI: 10.1007/s12250-016-3930-2

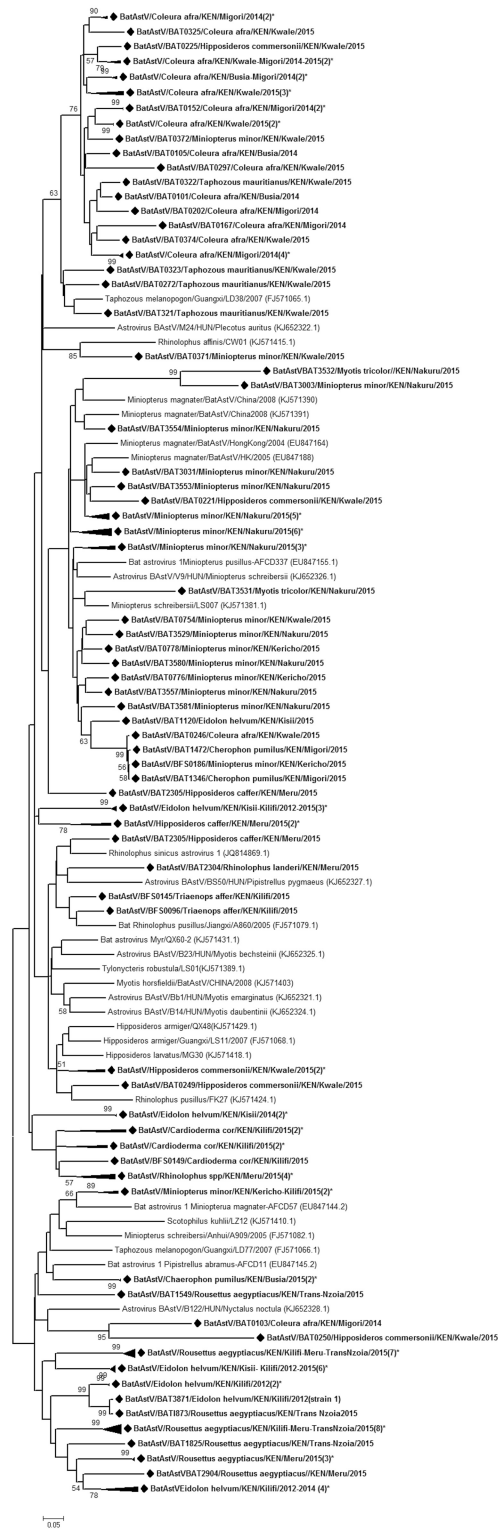

Figure S1. Phylogenetic tree of astroviruses. Phylogenetic tree of bat-astroviruses based on partial *RdRp* gene sequence (350 nt). The BtAstVs detected in this study are shown in boldface and denoted with a diamond node marker (◆). Taxon labels containing the label “(n)\*” represent a clade with ‘n’ number of sequences collapsed for ease of visualization of the tree. Detected taxa are named in the following pattern: Virus strain/Identification code/Bat Host species/Country/Specific collection location/Year of collection.

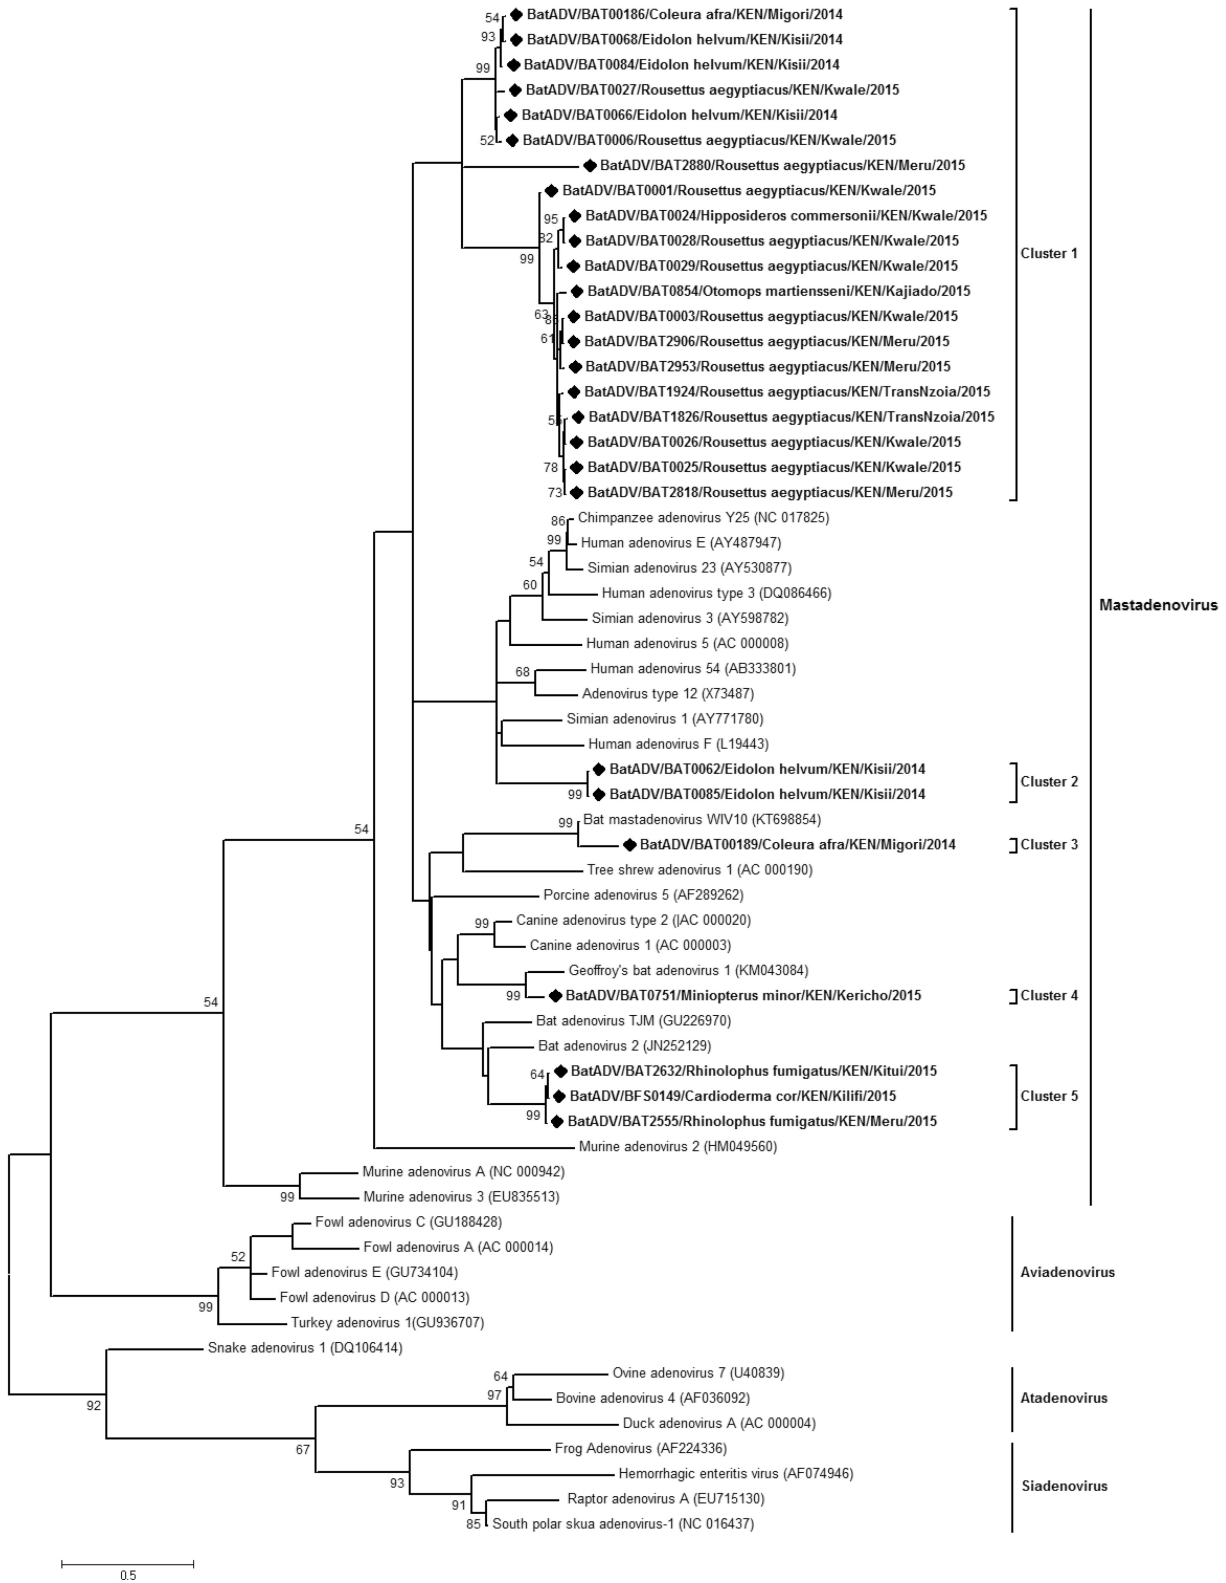

Figure S2. Phylogenetic tree of adenoviruses. Maximum likelihood tree of adenoviruses based on partial polymerase gene sequence (207 nt). The bat adenoviruses detected in this study are shown in boldface and denoted with a diamond (◆) on the node marker. Detected taxa are named in the following pattern: Virus strain/Identification code/Bat Host species/Country/Specific collection location/Year of collection. All ADVs detected in this study were found to be Mastadenoviruses.

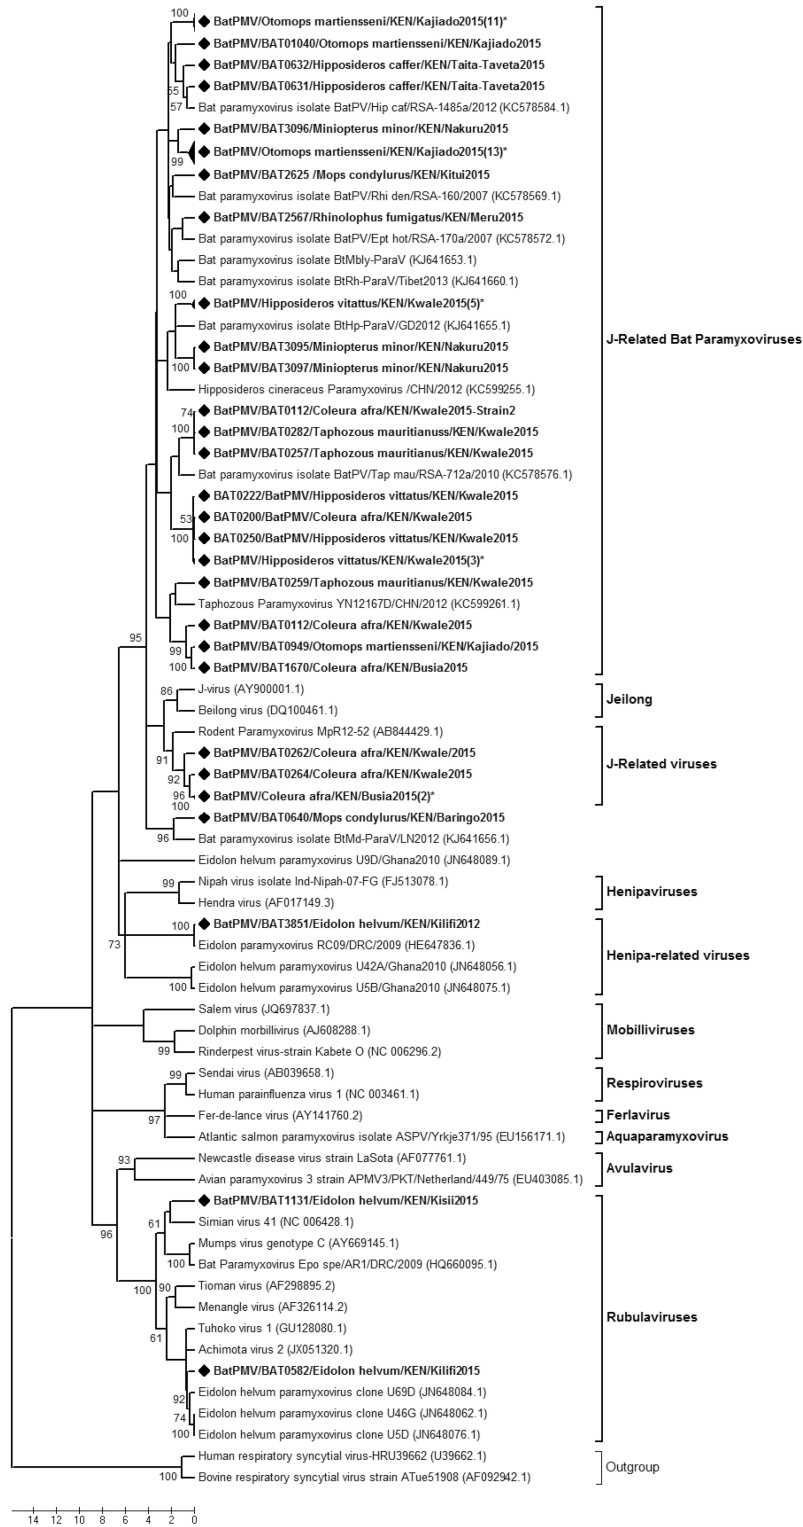

Figure S3. Phylogenetic tree of paramyxovirus. Maximum likelihood tree of paramyxoviruses based on partial polymerase gene sequence (409 nt). The BtPMVs detected in this study are shown in boldface and denoted with a diamond (◆) on the node marker. Taxon labels containing the label “(n)\*” represent a clade with ‘n’ number of sequences collapsed for ease of visualization of the tree. Detected taxa are named in the following pattern: Virus strain/Identification code/Bat Host species/Country/Specific collection location/Year of collection.

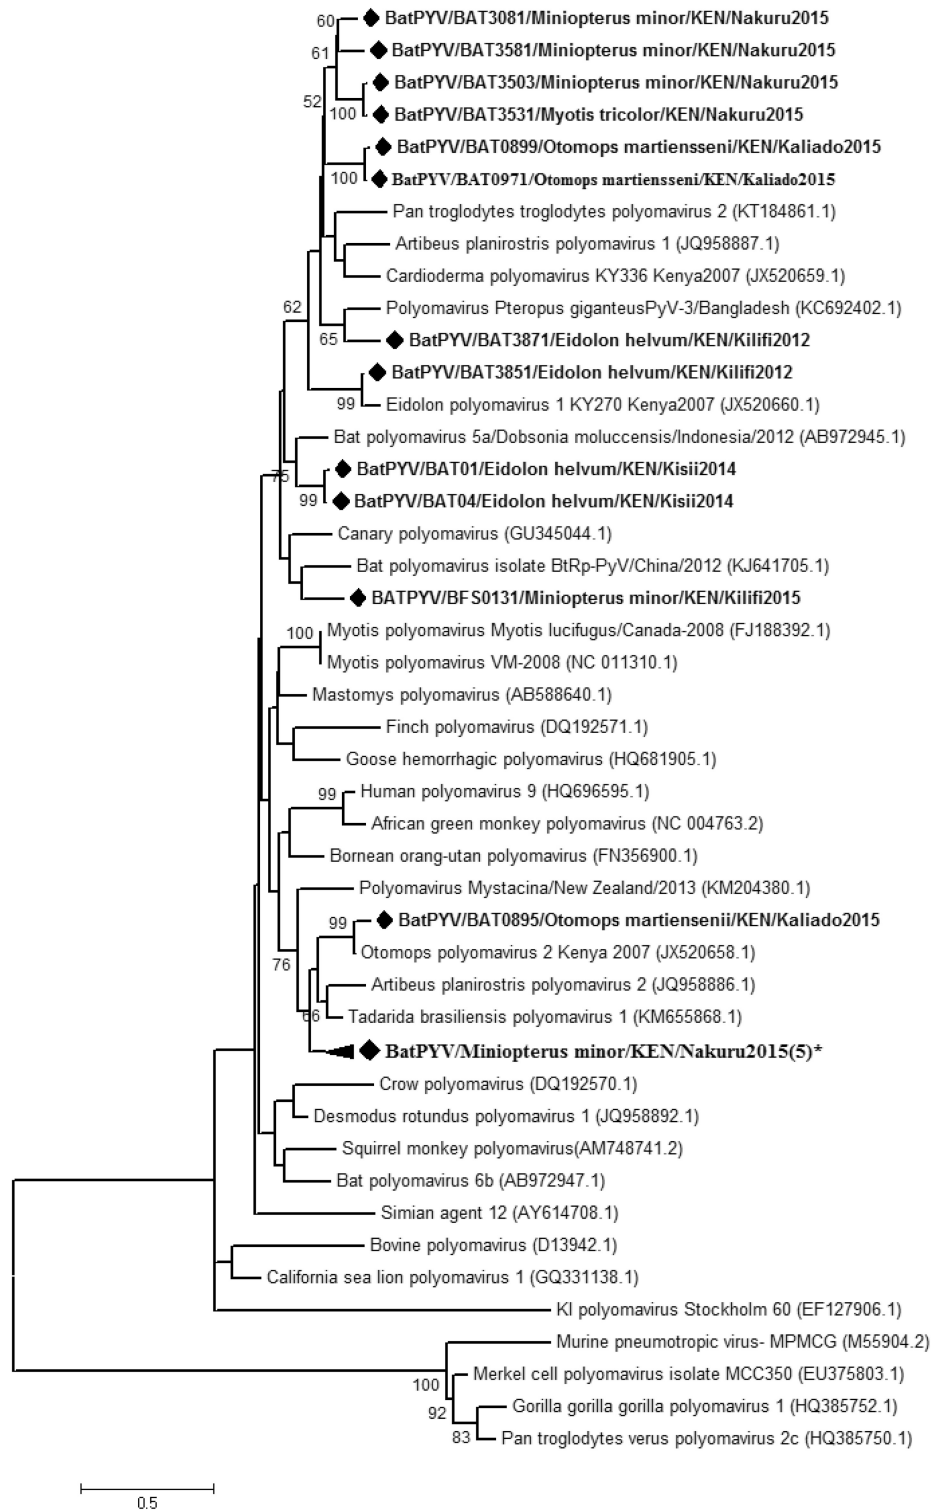

Figure S4. Phylogenetic tree of polyomavirus. Phylogenetic tree of polyomaviruses based on partial VP1 gene (236 bp). The BtPYVs detected in this study are shown in boldface and denoted with a diamond node marker (◆). Taxon labels containing the label “(n)\*” represent a clade with ‘n’ number of sequences collapsed for ease of visualization of the tree. Detected taxa are named in the following pattern: Virus strain/Identification code/Bat Host species/Country/Specific collection location/Year of collection.

Table S1. Table showing the primer sets used in the study

| Target virus name |         | Primer name      | Primer sequence (5'-3')            | Final amplicon size (nt) | Reference                                   |                                                        |
|-------------------|---------|------------------|------------------------------------|--------------------------|---------------------------------------------|--------------------------------------------------------|
| Adenovirus        | Round 1 | POLF1            | CAGCCKCKQTRRTGYAGGGT               | 250 bp                   | Li Yan <i>et al.</i> , 2010                 |                                                        |
|                   |         | POLR1            | GCHACCATYAGCTCCAACCTC              |                          |                                             |                                                        |
|                   | Round 2 | POLF2            | GGGCTCRTRTGCCAGCA                  |                          |                                             |                                                        |
|                   |         | POLR2            | TAYGACATCTGYGGCATGTA               |                          |                                             |                                                        |
| Astrovirus        | Round 1 | AstroFWD1        | GARTTYGATTGGRCKCGKTAYGA            | 422 bp                   | Chu <i>et al.</i> , 2008                    |                                                        |
|                   |         | AstroFWD2        | GARTTYGATTGGRCKAGGTAYGA            |                          |                                             |                                                        |
|                   |         | AstroRVS1        | GGYTTKACCCACATNCCRAA               |                          |                                             |                                                        |
|                   | Round 2 | AstroFWD3        | CGKTAYGATGGKACKATHCC               |                          |                                             |                                                        |
|                   |         | AstroFWD4        | AGGTAYGATGGKACKATH CC              |                          |                                             |                                                        |
|                   |         | AstroRVS1        | GGYTTKACCCACATNCCRAA               |                          |                                             |                                                        |
| Calciavirus       |         | Cal-P289         | TGACAATGTAATCATCACCATA             | 319-331bp                | Jiang <i>et al.</i> , 1999                  |                                                        |
|                   |         | Cal-P290         | GATTACTCCAAGTGGGACTCCAC            |                          |                                             |                                                        |
| Coronavirus       | Round 1 | CoV-FWD3         | GGTTGGGAYTAYCCHAARTGTGA            | 440 bp                   | Modified from Watanabe <i>et al.</i> , 2010 |                                                        |
|                   |         |                  | CoV-RVS3                           |                          |                                             | CCATCATCASWYRAATCATCATA                                |
|                   | Round 2 | CoV-FWD4/<br>Bat | GAYTAYCCHAARTGTGAYAGAGC            |                          |                                             |                                                        |
|                   |         |                  | CoV-RVS3                           |                          |                                             | CCATCATCASWYRAATCATCATA                                |
| Flavivirus        | Round 1 | Flavi1+          | GAYYTIGGITGYGGIIGGIRGITGG          | 141 bp                   | Sanchez-seco <i>et al.</i> , 2005           |                                                        |
|                   |         |                  | Flavi1-                            |                          |                                             | TCCCAICCGICIRTRTCRTICIGC                               |
|                   | Round 2 | Flavi2+          | YGYRTIYAYAWCAYSATGGG               |                          |                                             |                                                        |
|                   |         |                  | Flavi2-                            |                          |                                             | CCARTGITCYKYRTTIAIRAAICC                               |
| Filovirus         | Round 1 | FiloNPF1         | TGGCARTCRGTIGGACAYATGATGGT         | 391 bp                   | In- house designed                          |                                                        |
|                   |         |                  | FiloNPF2                           |                          |                                             | TGGCTYACYACAGGYCAYATGAAAGT                             |
|                   |         |                  | FiloNPR1                           |                          |                                             | TRATYTCRTTYTTITTCTGITGGAA                              |
|                   |         |                  | FiloNPR2                           |                          |                                             | TGATCTCATTTTTCCGGGAGTGGAA                              |
|                   |         |                  | FiloNPR3                           |                          |                                             | TGATYTCAGTYTTYTGAAGITGGAA                              |
|                   |         |                  | FiloNPR4                           |                          |                                             | TCAGCYTCAGTAGCAGCCTCAC                                 |
|                   | Round 2 | FiloNPF3         | TGGTIGCIGGICAYGATGCIAAYGA          |                          |                                             |                                                        |
|                   |         |                  | FiloNPF4                           |                          |                                             | TGGTGACAGGTCATGATGCMATGA                               |
|                   |         |                  | FiloNPR4                           |                          |                                             | TCAGCYTCAGTAGCAGCCTCAC                                 |
|                   |         |                  | FiloNPR5                           |                          |                                             | TCRGCYTCAGTKGCWGCITCTC                                 |
|                   |         | FiloNPR6         | TCYGCATCATGTGCIGCCTCTC             |                          |                                             |                                                        |
| Paramyxovirus     | Round 1 | PAR-F1           | GAAGGITATTGTCAIAARNTNTGGAC         | 561 bp                   | Tong <i>et al.</i> , 2008                   |                                                        |
|                   |         |                  | PAR-R                              |                          |                                             | GCTGAAGTTACIGGITCICCDATRTTNC                           |
|                   | Round 2 | PAR-F2           | GTTGCTTCAATGGTTCARGGNGAYAA         |                          |                                             |                                                        |
|                   |         |                  | PAR-R                              |                          |                                             | GCTGAAGTTACIGGITCICCDATRTTNC                           |
| Polyomavirus      | Round 1 | VP1/lf           | CCAGACCCAACTARRAATGARAA            | 249–273 bp               | Johne <i>et al.</i> , 2005                  |                                                        |
|                   |         |                  | VP1/1r                             |                          |                                             | AACAAGAGACACAAATNTTCCNCC<br>ATGAAAATGGGGTTGGCCCNCTNTGY |
|                   | Round 2 | VP1/2f           | AARG<br>CCCTCATAAACCCGAACYTCYTCHAC |                          |                                             |                                                        |
|                   |         |                  | VP1/2r                             |                          |                                             | YTG                                                    |
| Rotavirus         | Round 1 | VP6-F            | GACGGVGCRACTACATGGT                | 1356 bp                  | Matthijnssens <i>et al.</i> , 2006          |                                                        |
|                   |         |                  | GTCCAATTCATNCCTGGTGG               |                          |                                             |                                                        |

Table S2. Nucleotide sequence identity comparison for members of the Rotavirus A group

|                                                              | 322BatRVA/ <i>T. affer</i> /KEN/2015 | 2980BatRVA/ <i>R. aegyptiacus</i> /KEN//2015 |
|--------------------------------------------------------------|--------------------------------------|----------------------------------------------|
| Percentage nt similarities (%)                               |                                      |                                              |
| <b>322BatRVA/<i>Taphozous affer</i>/KEN/Kwale/2015</b>       |                                      |                                              |
| <b>2980BatRVA/<i>Rousettus aegyptiacus</i>/KEN/Meru/2015</b> |                                      |                                              |
| GU983675.1 _Rotavirus_A_bat/4852/Kenya/2007                  | 79.86                                | 79.25                                        |
| KX268791.1 _Rotavirus_A_isolate_Bat-wt/CMR                   | 74.01                                | 73.75                                        |
| KX268780.1 _Rotavirus_A_isolate_Bat-wt/CMR                   | 80.12                                | 79.59                                        |
| KX268769.1 _Rotavirus_A_isolate_Bat-wt/CMR                   | 74.1                                 | 73.84                                        |
| KX268758.1 _Rotavirus_A_isolate_Bat-wt/CMR                   | 73.84                                | 73.75                                        |
| KX268747.1 _Rotavirus_A_isolate_Bat-wt/CMR                   | 73.84                                | 73.75                                        |
| KJ020894.1 _Rotavirus_A_isolate_RVA/Bat-tc/CHN               | 79.51                                | 81.16                                        |
| HM627557.1 _Human_rotavirus_A_strain_B10                     | 80.64                                | 87.61                                        |
| EF554119.1 _Rotavirus_A_strain_RVA/Human-wt/BEL              | 94.68                                | 80.12                                        |
| KP882661.1 _Rotavirus_A_strain_RVA/Human-wt/GHA              | 94.42                                | 80.03                                        |
| KP882738.1 _Rotavirus_A_strain_RVA/Human-wt/KEN              | 79.16                                | 79.59                                        |
| K02086.1 RO2SEG6_Human_Wa_rotavirus                          | 79.25                                | 78.11                                        |
| AY787645.1 _Human_rotavirus_A_strain_TB-Chen                 | 85.52                                | 79.77                                        |
| DQ146664.1 _Rotavirus_A_strain/Human-wt/BGD/Dhaka12          | 79.33                                | 79.33                                        |
| DQ146702.1 _Rotavirus_A_strain_RVA/Human-tc/THA              | 79.94                                | 81.95                                        |
| DQ490555.1 _Rotavirus_A_strain_RVA/Human-wt/BGD              | 92.15                                | 81.16                                        |
| DQ870507.1 _Rotavirus_A_strain_RVA/Human-tc/USA              | 86.13                                | 80.03                                        |
| EF554086.1 _Rotavirus_A_strain_RVA/Human-wt/BEL              | 91.8                                 | 80.9                                         |
| EF583048.1 _Rotavirus_A_strain_RVA/Human-tc/GBR              | 78.63                                | 78.55                                        |
| AY594670.1 _Rotavirus_strain_TUCH-Rhesus                     | 80.73                                | 81.95                                        |
| FJ422136.1 _Rotavirus_A_strain_RVA/Rhesus-tc/USA             | 93.11                                | 80.29                                        |
| X69487.1 _Rotavirus_A_Porcine strain YM                      | 79.68                                | 77.76                                        |
| KP753064.1 _Rotavirus_A_strain_RVA/Pig-wt/ZAF                | 93.19                                | 80.55                                        |
| AF317123.1 _Porcine_rotavirus                                | 79.33                                | 76.89                                        |
| KJ752065.1 _Rotavirus_A_strain_RVA/Cow-wt/ZAF                | 94.42                                | 79.94                                        |
| GU384194.1 _Bovine_rotavirus_A_isolate_DQ-75                 | 93.28                                | 79.59                                        |
| FJ495131.1 _Rotavirus_A_strain_RVA/Antelope-wt/ZAF           | 94.5                                 | 79.94                                        |
| FJ347126.1 _Rotavirus_A_strain_RVA/Guanaco-wt/ARG            | 91.89                                | 80.2                                         |
| D82970.1 RO1ICPVP6A_Chicken Rotavirus A                      | 69.31                                | 67.91                                        |
| D16329.2 AROVP6_Avian_rotavirus_A                            | 70.18                                | 70.09                                        |
| U65988.1 MRU65988_Murine_rotavirus A                         | 79.07                                | 78.11                                        |
| AB971764.1 _Rotavirus_A_strain:RVA/SugarGlider-tc/JPN        | 78.46                                | 80.38                                        |

Table S3. Percentage amino acid sequence similarity of detected BtCaIV with other representative caliciviruses

|                                               | CaIV22/R. <i>aegyptiacus</i> /<br>KEN/KIf/2015 | CaIV2228/Mops<br><i>condylurus</i> /KEN/Mars/<br>2015 | CaIV2255/Mops<br><i>condylurus</i> /KEN/Mars/<br>2015 |
|-----------------------------------------------|------------------------------------------------|-------------------------------------------------------|-------------------------------------------------------|
| Percentage nt similarities (%)                |                                                |                                                       |                                                       |
| <b>CaIV22/R. <i>aeg</i>/KEN/KIf/2015</b>      |                                                |                                                       |                                                       |
| <b>CaIV2228/Mops/KEN/Mar/2015</b>             | 68.13                                          |                                                       |                                                       |
| <b>CaIV2255/Mops/KEN/Mar/2015</b>             | 68.13                                          | 100                                                   |                                                       |
| AAA47285.1 Rabbit Hemorrhagic DV              | 61.53                                          | 51.64                                                 | 51.64                                                 |
| AAB50465.1 Norwalk Virus                      | 41.75                                          | 40.65                                                 | 40.65                                                 |
| AAA92983.1 Southampton virus                  | 41.75                                          | 40.65                                                 | 40.65                                                 |
| CAA93445.1 European brown hare syndrome virus | 61.53                                          | 52.74                                                 | 52.74                                                 |
| AAB97767.2 Hawaii Calicivirus                 | 46.15                                          | 49.45                                                 | 49.45                                                 |
| AAA96501.2 San Miguel sea lion virus          | 54.94                                          | 49.45                                                 | 49.45                                                 |
| AAL99277.1 Calicivirus NB                     | 52.74                                          | 49.45                                                 | 49.45                                                 |
| AAT39864.1 Porcine enteric CaIV               | 60.43                                          | 64.83                                                 | 64.83                                                 |
| AAY60849.1 Nebovirus Newbury 1                | 52.74                                          | 50.54                                                 | 50.54                                                 |
| ABD16233.1 Porcine sapovirus                  | 65.93                                          | 71.42                                                 | 71.42                                                 |
| ABO43773.1 Porcine enteric sapovirus          | 65.93                                          | 70.32                                                 | 70.32                                                 |
| ACB38131.1 Tulane virus                       | 38.46                                          | 34.06                                                 | 34.06                                                 |
| ACJ63217.1 Pig sapovirus/NLD                  | 53.84                                          | 56.04                                                 | 56.04                                                 |
| ACQ44561.1 Pig calicivirus/CAN                | 38.46                                          | 38.46                                                 | 38.46                                                 |
| ACQ44563.1 Pig calicivirus/CAN                | 38.46                                          | 38.46                                                 | 38.46                                                 |
| ACZ69384.1 Swine sapovirus/BR                 | 50.54                                          | 52.74                                                 | 52.74                                                 |
| AFH89833.1 Turkey calicivirus                 | 54.94                                          | 50.54                                                 | 50.54                                                 |
| AFH89835.1 Chicken calicivirus                | 53.84                                          | 48.35                                                 | 48.35                                                 |
| AFJ39353.1 Bat sapovirus TLC39/HK             | 68.13                                          | 74.72                                                 | 74.72                                                 |
| AFJ39355.1 Bat sapovirus TLC58/HK             | 68.13                                          | 74.72                                                 | 74.72                                                 |
| AFM93994.1 Recovirus/Bangladesh               | 43.95                                          | 39.56                                                 | 39.56                                                 |
| AID54988.1 BatCaIV/M63/HUN/2013               | 67.03                                          | 78.02                                                 | 78.02                                                 |
| AID54989.1 Bat Calicivirus/HUN                | 32.96                                          | 27.47                                                 | 27.47                                                 |
| AJA31687.1 Porcine sapovirus/ETH              | 61.53                                          | 67.03                                                 | 67.03                                                 |
| AJA31689.1 Porcine sapovirus/ETH              | 40.65                                          | 42.85                                                 | 42.85                                                 |
| AGH15844.2 Swine sapovirus/USA                | 57.14                                          | 57.14                                                 | 57.14                                                 |
